# Supplementary material for: Fundamental reaction pathway and free energy profile of proteasome inhibition by syringolin A (SylA)
Source: Royal Society of Chemistry journal article supplement (doi:10.1039/c5ob00737b), 2015-01-01
Supplement: c5ob00737b1.pdf [file c5ob00737b1.pdf]

## ESI: Fundamental reaction pathway and free energy profile for proteasome inhibition by syringolin A (SylA)

Donghui Wei,<sup>1,2,3</sup> Mingsheng Tang,<sup>1</sup> and Chang-Guo Zhan<sup>2,3</sup>

<sup>1</sup>Department of Chemistry, Zhengzhou University, Daxue Road, Zhengzhou, Henan 450052, China, <sup>2</sup>Molecular Modeling and Biopharmaceutical Center and <sup>3</sup>Department of Pharmaceutical Sciences, College of Pharmacy, University of Kentucky, 789 South Limestone Street, Lexington, KY 40536, USA

**Running title:** Reaction pathway for proteasome inhibition by SylA

### **Correspondence:**

Chang-Guo Zhan, Ph.D.

Director, *Molecular Modeling and Biopharmaceutical Center*

Endowed College of Pharmacy Professor in Pharmaceutical Sciences

Professor, Department of Pharmaceutical Sciences

College of Pharmacy

University of Kentucky

789 South Limestone Street

Lexington, KY 40536

Phone: 859-323-3943

E-mail: [zhan@uky.edu](mailto:zhan@uky.edu)

Table S1. Absolute QM/MM energies (in Hartree) calculated at the QM/MM (B3LYP/6-31++G\*\*):AMBER) level (single-point energy calculations) using the geometries optimized at the QM/MM(B3LYP/6-31G\*):AMBER) level.

| State | Energy         |
|-------|----------------|
| ER    | -1864.49293844 |
| TS1   | -1864.47264264 |
| INT1  | -1864.50238344 |
| TS2   | -1864.47969914 |
| INT2  | -1864.48317333 |
| TS3   | -1864.48255882 |
| EP    | -1864.52221434 |
